# Supplementary material for: Novel Co5 and Ni4 Metal Complexes and Ferromagnets by the Combination of 2-Pyridyl Oximes with Polycarboxylic Ligands
Source: MDPI journal article supplement (doi:10.3390/molecules27154701), 2022-07-22
Supplement: s1 [file s1]

# Novel Co<sub>5</sub> and Ni<sub>4</sub> Metal Complexes and Ferromagnets by the Combination of 2-Pyridyl Oximes with Polycarboxylic Ligands

Foteini Dimakopoulou <sup>1</sup>, Costantinos G. Efthymiou <sup>1</sup>, Ciaran O'Malley <sup>1</sup>, Andreas Kourtellaris <sup>2</sup>, Eleni Moushi <sup>3</sup>, Anastasios Tasiopoulos <sup>2</sup>, Spyros P. Perlepes <sup>4</sup>, Patrick McArdle <sup>1</sup>, Ernesto Costa-Villén <sup>5</sup>, Julia Mayans <sup>5</sup> and Constantina Papatriantafyllopoulou <sup>1,\*</sup>

<sup>1</sup> School of Biological and Chemical Sciences, College of Science and Engineering, National University of Ireland Galway, University Road, H91 TK33 Galway, Ireland; f.dimakopoulou1@nuigalway.ie (F.D.); dinosef@yahoo.com (C.G.E.); c.omalley16@nuigalway.ie (C.O. ); patrick.mcardle@nuigalway.ie (P.M.)

<sup>2</sup> Department of Chemistry, University of Cyprus, Nicosia 1678, Cyprus; kourtellaris.andreas@ucy.ac.cy (A.K.); atasio@ucy.ac.cy (A.T.)

<sup>3</sup> Department of Life Sciences, European University of Cyprus, Nicosia 2404, Cyprus; e.moushi@euc.ac.cy

<sup>4</sup> Department of Chemistry, University of Patras, 26504 Patras, Greece; perlepes@upatras.gr

<sup>5</sup> Departament de Química Inorgànica i Orgànica, Secció Inorgànica and Institute of Nanoscience (IN2UB) and Nanotechnology, Universitat de Barcelona, Martí i Franques 1-11, 08028 Barcelona, Spain; ernesto.costa@qi.ub.edu (E.C.-V.); julia.mayans@qi.ub.edu (J.M.)

\* Correspondence: constantina.papatriantafyllopo@nuigalway.ie; Tel.: +353-91-493462

**Table S1.** Selected interatomic distances (Å) and angles for **1**.

| <b>Bonds</b>  |            |           |            |
|---------------|------------|-----------|------------|
| Ni1-O3        | 2.018(3)   | Ni1-N3    | 2.019(3)   |
| Ni1-O4        | 1.988(3)   | Ni2-O3    | 1.814(3)   |
| Ni1-O19       | 2.272(4)   | Ni2-N4    | 1.846(3)   |
| Ni1-N1        | 2.098(4)   | Ni2-N5    | 1.886(4)   |
| Ni1-N2        | 2.057(3)   | Ni2-N6    | 1.855(4)   |
| <b>Angles</b> |            |           |            |
| N1-Ni1-O19    | 174.50(15) | N5-Ni2-O3 | 173.15(14) |
| N3-Ni1-O4     | 169.49(13) | N4-Ni2-N6 | 174.77(15) |
| N2-Ni1-O3     | 175.00(14) |           |            |

**Table S2.** Selected interatomic distances (Å) and angles for **2**.

| <b>Bonds</b> |          |         |          |
|--------------|----------|---------|----------|
| Co1-O3       | 1.951(5) | Co3-O7  | 1.913(5) |
| Co1-O9       | 1.904(5) | Co3-O11 | 1.925(5) |
| Co1-N1       | 1.922(6) | Co4-O7  | 1.913(5) |
| Co1-N2       | 1.885(6) | Co4-O10 | 1.902(5) |
| Co1-N3       | 1.916(6) | Co4-N9  | 1.914(6) |
| Co1-N4       | 1.908(6) | Co4-N10 | 1.894(6) |
| Co2-O1       | 1.907(5) | Co4-N11 | 1.931(5) |

|               |            |             |          |
|---------------|------------|-------------|----------|
| Co2-O9        | 1.901(5)   | Co4-N12     | 1.899(6) |
| Co2-N5        | 1.911(6)   | Co5-O6      | 1.948(5) |
| Co2-N6        | 1.901(6)   | Co5-O10     | 1.911(5) |
| Co2-N7        | 1.917(6)   | Co5-N13     | 1.921(6) |
| Co2-N8        | 1.907(6)   | Co5-N14     | 1.886(6) |
| Co3-O1        | 2.104(5)   | Co5-N15     | 1.908(6) |
| Co3-O4        | 1.946(5)   | Co5-N16     | 1.908(6) |
| Co3-O5        | 1.942(5)   |             |          |
| <b>Angles</b> |            |             |          |
| O3-Co1-N4     | 173.9(2)   | O4-Co3-O5   | 108.1(2) |
| N1-Co1-O9     | 172.0(2)   | O7-Co4-N9   | 174.5(2) |
| N2-Co1-N3     | 178.3(2)   | O10-Co4-N11 | 170.0(2) |
| O1-Co2-N7     | 174.0(2)   | N10-Co4-N12 | 176.2(2) |
| N6-Co2-N8     | 175.3(3)   | O6-Co5-N16  | 174.1(2) |
| O9-Co2-N5     | 170.1(2)   | O10-Co5-N13 | 171.1(2) |
| O1-Co3-O7     | 173.50(18) | N14-Co5-N15 | 178.0(3) |

**Table S3.** Selected interatomic distances (Å) and angles for **3**.

|               |          |             |          |
|---------------|----------|-------------|----------|
| <b>Bonds</b>  |          |             |          |
| Co1-O4        | 1.947(7) | Co3-N7      | 2.114(6) |
| Co1-O6        | 1.908(6) | Co3-N12     | 2.114(6) |
| Co1-O24       | 1.927(6) | Co4-O12     | 1.878(8) |
| Co1-N2        | 1.900(6) | Co4-O16     | 1.908(6) |
| Co1-N4        | 1.907(7) | Co4-O18     | 1.913(9) |
| Co1-N11       | 1.888(7) | Co4-N6      | 1.907(7) |
| Co2-O2        | 2.004(6) | Co4-N8      | 1.889(7) |
| Co2-O20       | 1.980(6) | Co4-N10     | 1.840(8) |
| Co2-O25       | 2.030(6) | Co5-O8      | 2.011(6) |
| Co2-N1        | 2.058(6) | Co5-O10     | 1.992(6) |
| Co2-N9        | 2.114(7) | Co5-O25     | 1.986(5) |
| Co3-O14       | 1.994(6) | Co5-N3      | 2.086(6) |
| Co3-O22       | 2.004(6) | Co5-N5      | 2.122(6) |
| Co3-O25       | 1.997(5) |             |          |
| <b>Angles</b> |          |             |          |
| O4-Co1-N4     | 171.8(3) | O14-Co3-O25 | 130.9(3) |
| O6-Co1-N11    | 171.7(3) | O12-Co4-N10 | 169.8(3) |
| O24-Co1-N2    | 170.9(3) | O18-Co4-N8  | 171.2(3) |
| N1-Co2-N9     | 176.2(3) | O16-Co4-N6  | 171.3(3) |
| O2-Co2-O25    | 129.1(2) | N3-Co5-N5   | 175.8(3) |
| O20-Co2-O25   | 126.0(3) | O8-Co5-O25  | 129.9(2) |
| N7-Co3-N12    | 176.6(3) | O10-Co5-O25 | 128.2(2) |

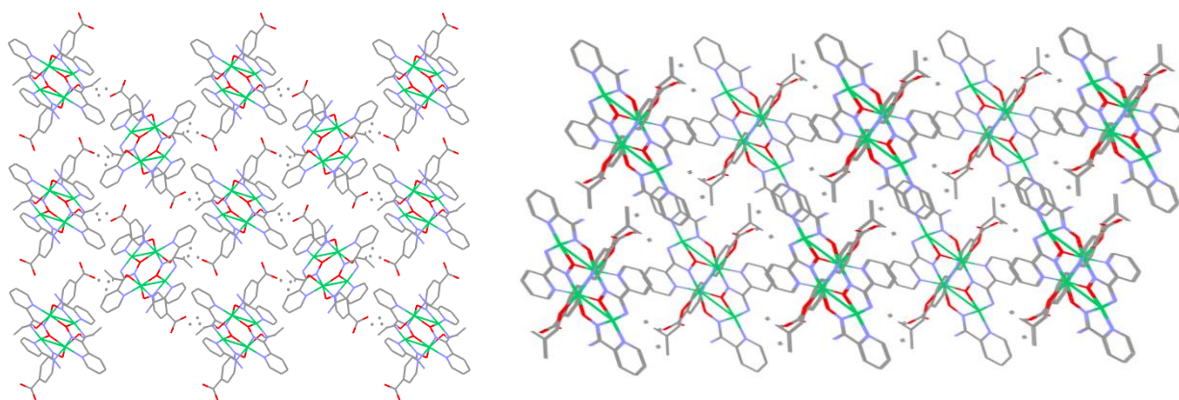

**Figure S1.** The 2D supramolecular network in **1** coming from the arrangement of Ni<sub>4</sub> clusters through H-bonding interactions (left), and the arrangement of two parallel 2D supramolecular planes (right).

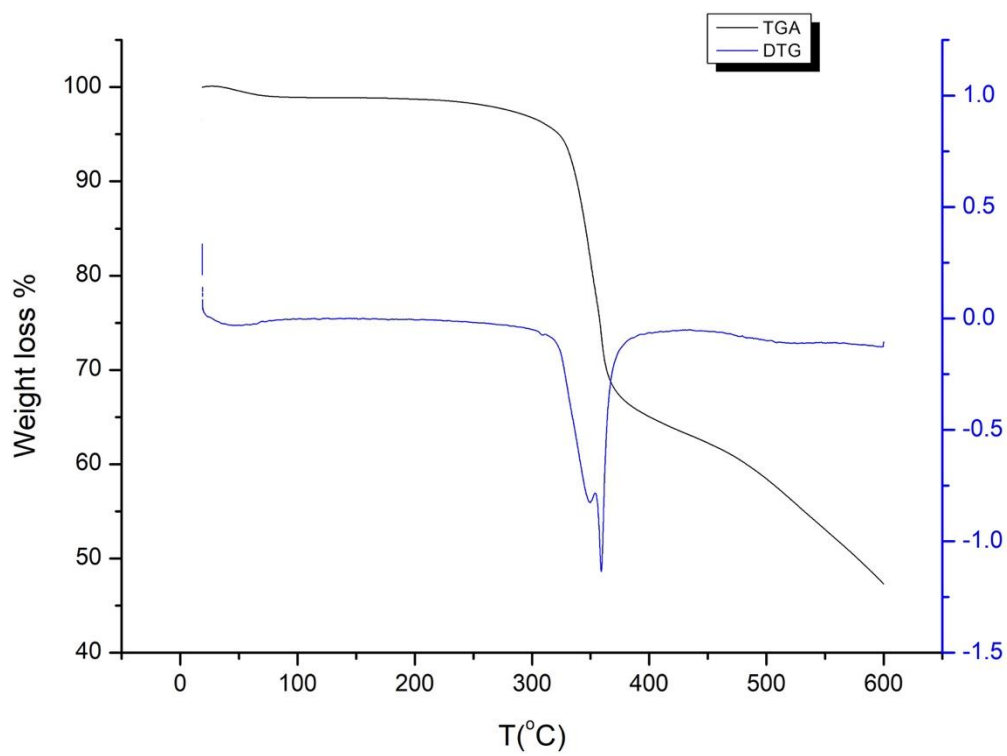

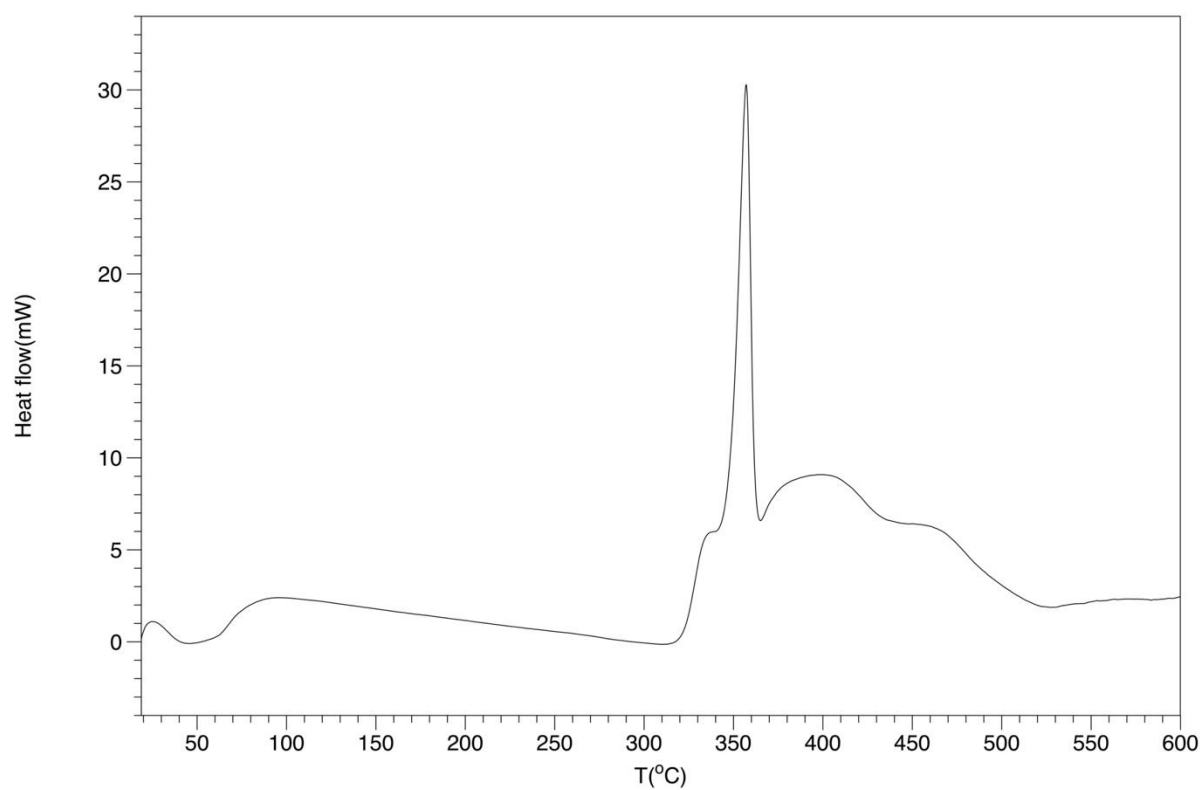

**Figure S2.** TGA-DTG (top) and DSC curves (bottom) of compound **1**.

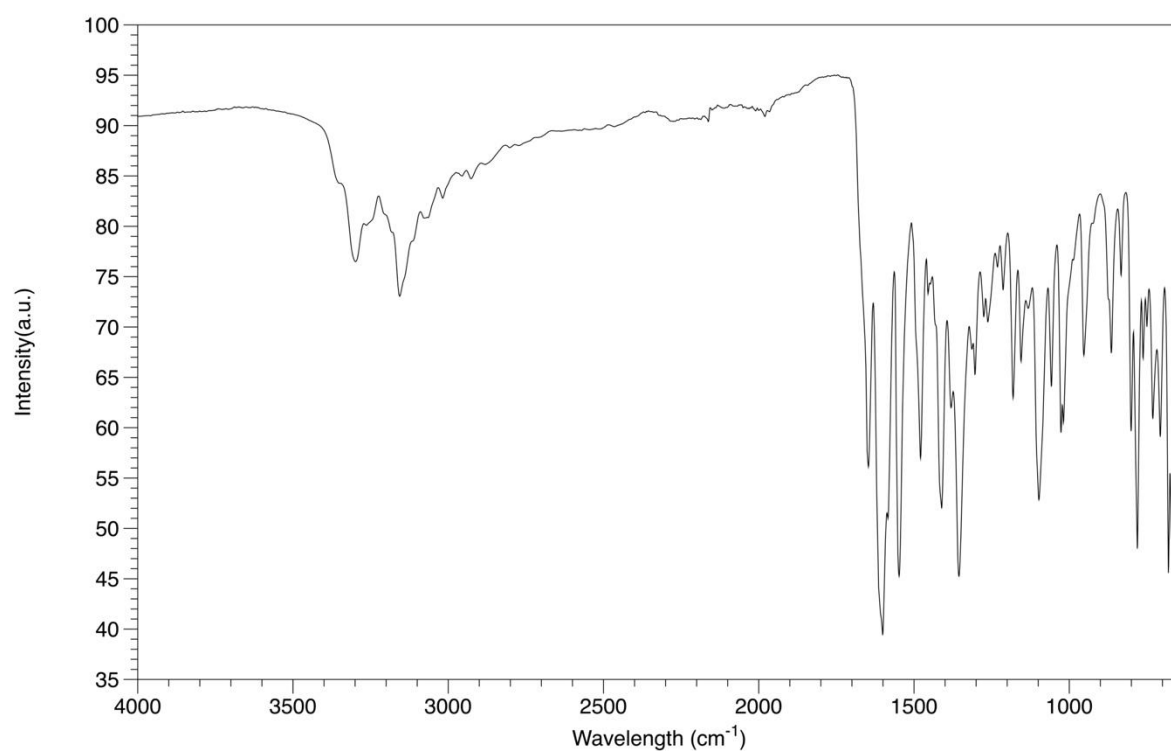

**Figure S3.** IR spectrum of compound **1**.

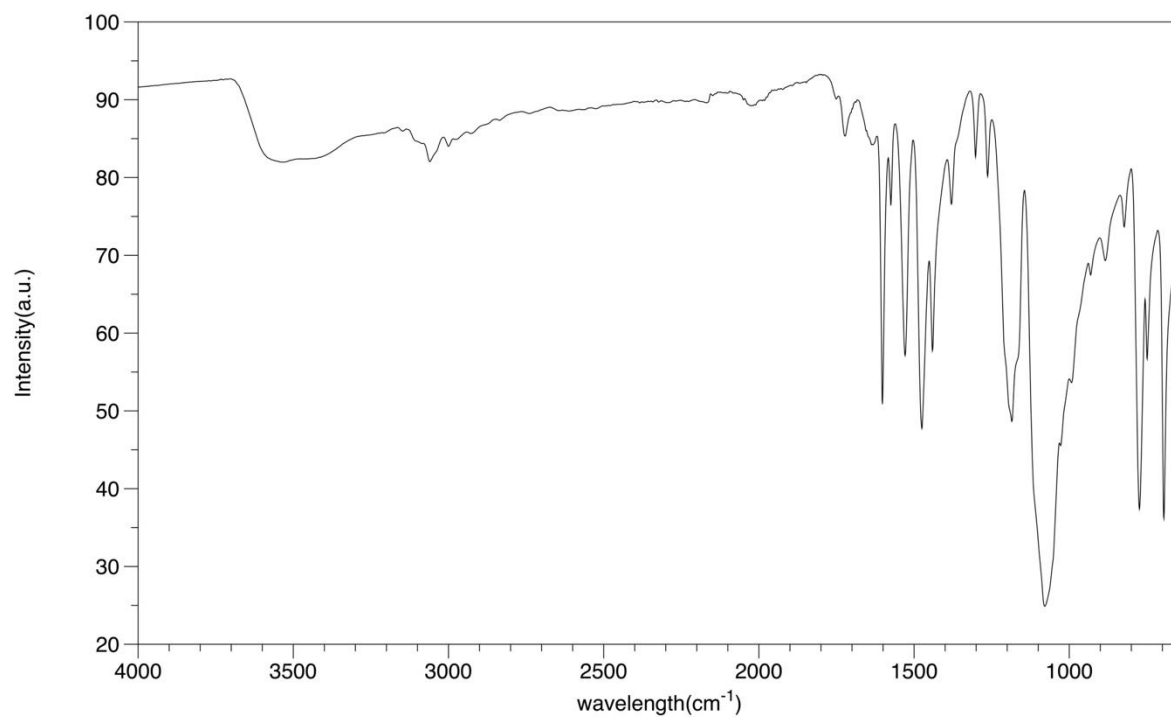

**Figure S4.** IR spectrum of compound **2**.

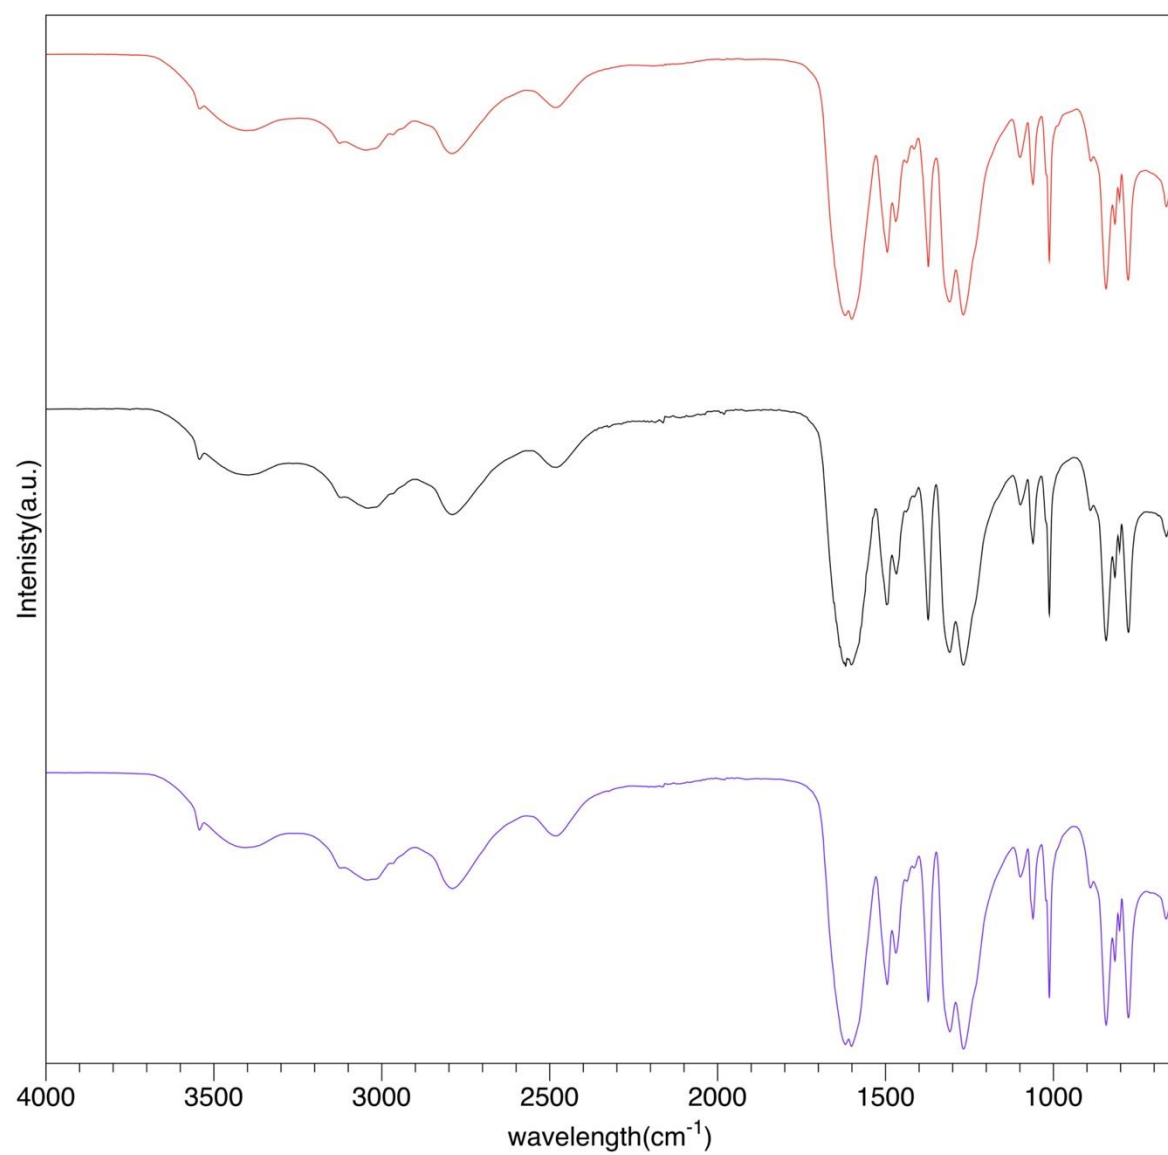

**Figure S5.** IR spectra of compound **3**: crystals from method A, top; crystals from method B, middle; crystals from Method C, bottom.

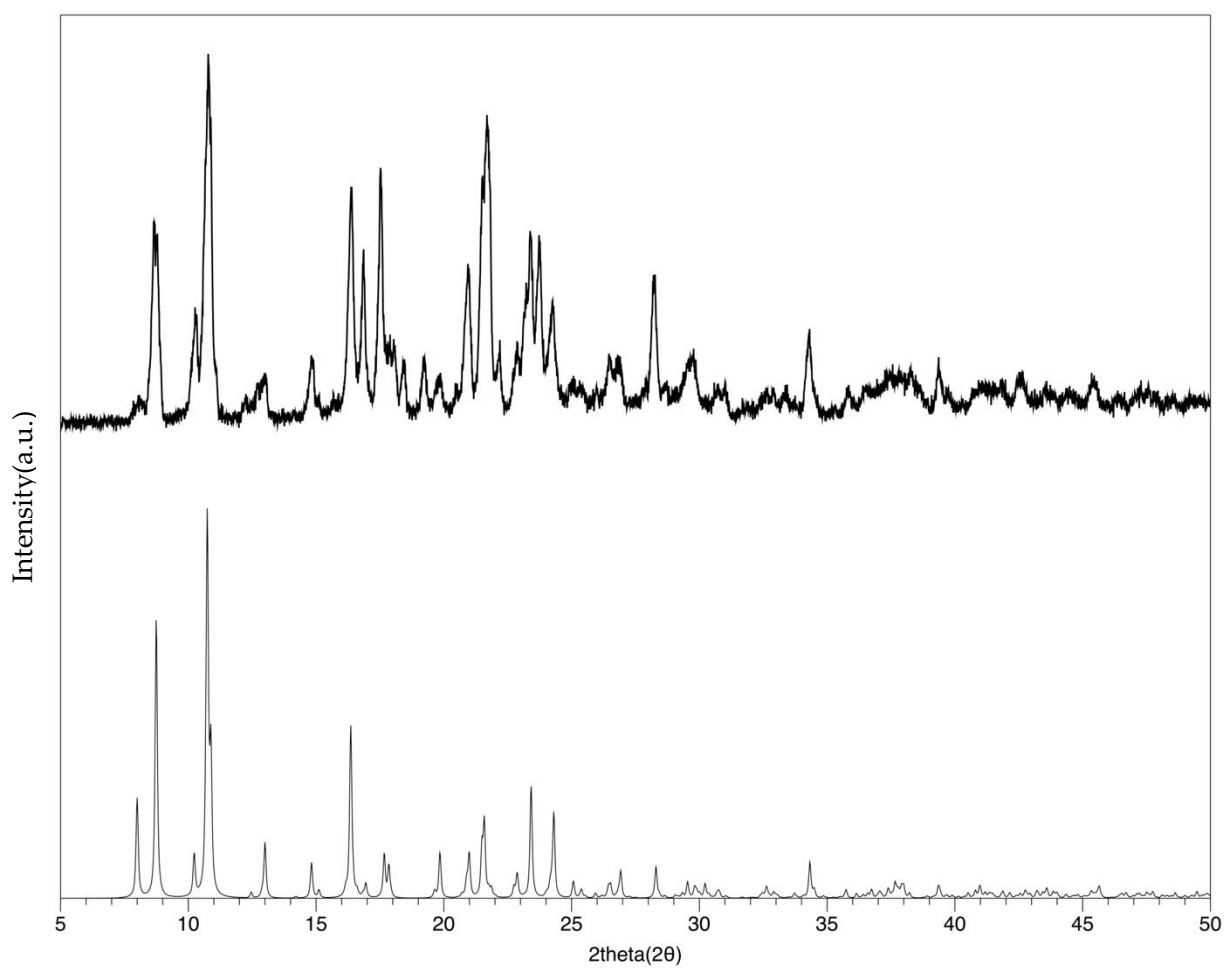

**Figure S6.** Powder XRD patterns of compound **1**: experimental powder pattern, top; simulated, bottom.
